# Supplementary material for: Safety and immunogenicity of a subtype C ALVAC-HIV (vCP2438) vaccine prime plus bivalent subtype C gp120 vaccine boost adjuvanted with MF59 or alum in healthy adults without HIV (HVTN 107): A phase 1/2a randomized trial
Source: PLOS journal article supplement (doi:10.1371/journal.pmed.1004360), 2024-03-19
Supplement: S3 (10.1371/journal.pmed.1004360.s003) [file journal.pmed.1004360.s003]

**Table S1: Details of the BAMA and ICS antigens including HIV-1 viral strain information**

| Assay    | Antigen class | Full antigen name        | Antigen label used in plot | Viral strain information: Subtype.Country.Year.Stage * |
|----------|---------------|--------------------------|----------------------------|--------------------------------------------------------|
| BAMA bAb | gp120         | 1086C_D7gp120.avi/293F   | 1086 gp120                 | C.MW.04.1-2                                            |
|          |               | TV1c8_D11gp120.avi/293F  | TV1 gp120                  | C.ZA.98.6                                              |
|          |               | 96ZM651.D11gp120.avi     | ZM96 gp120                 | C.ZM.96.6                                              |
|          | V1V2          | C.1086_V1_V2 Tags        | 1086 V1V2                  | C.MW.04.1-2                                            |
|          |               | gp70-TV1.GSKvacV1V2/293F | TV1 V1V2                   | C.ZA.98.6                                              |
|          |               | gp70-96ZM651.02 V1v2     | ZM96 V1V2                  | C.ZM.96.6                                              |
|          |               | gp70_B.CaseA_V1_V2       | B.CaseA V1V2               | B.US.88.6                                              |
|          |               | AE.A244 V1V2 Tags/293F   | A244 V1V2                  | CRF01_AE.TH.90.6                                       |
| ICS      | gp120         | 1086 gp120               | 1086 gp120                 | -                                                      |
|          | gp120         | TV1 gp120                | TV1 gp120                  | -                                                      |
|          | gp140         | ZM96 gp140               | ZM96 gp140                 | -                                                      |

\*Subtype is denoted by a capital letter; country of origin is denoted by the 2 digit International Organization for Standardization code; year isolated is denoted by 2 digits; and stage is denoted by “a” (acute, if Fiebig stage is unknown) or “1”, “2”, “3”, “4”, “5”, or “6” (acute or early chronic, where the number or range corresponds to the Fiebig stage or range of stages when known).
