# Supplementary material for: Safety and immunogenicity of a subtype C ALVAC-HIV (vCP2438) vaccine prime plus bivalent subtype C gp120 vaccine boost adjuvanted with MF59 or alum in healthy adults without HIV (HVTN 107): A phase 1/2a randomized trial
Source: PLOS journal article supplement (doi:10.1371/journal.pmed.1004360), 2024-03-19
Supplement: S5 (10.1371/journal.pmed.1004360.s005) [file journal.pmed.1004360.s005]

**Table S3. CD8+ T-cell responses (measured by expression of IFN- $\gamma$  and/or IL-2 and/or CD40L) to TV1 gp120 at months 6.5, 12, 12.5, 18.**

|                   | Response Rate | 95% CI        |
|-------------------|---------------|---------------|
| <b>Month 6.5</b>  |               |               |
| MF59              | 1/27 (3.7%)   | (0.7%, 18.3%) |
| Alum              | 0/27 (0.0%)   | (0.0%, 12.5%) |
| Co-admin          | 0/28 (0.0%)   | (0.0%, 12.1%) |
| None              | 0/17 (0.0%)   | (0.0%, 18.4%) |
| <b>Month 12</b>   |               |               |
| MF59              | 2/26 (7.7%)   | (2.1%, 24.1%) |
| Alum              | 0/29 (0.0%)   | (0.0%, 11.7%) |
| Co-admin          | 0/28 (0.0%)   | (0.0%, 12.1%) |
| None              | 2/17 (11.8%)  | (3.3%, 34.3%) |
| <b>Month 12.5</b> |               |               |
| MF59              | 2/27 (7.4%)   | (2.1%, 23.4%) |
| Alum              | 0/28 (0.0%)   | (0.0%, 12.1%) |
| Co-admin          | 1/28 (3.6%)   | (0.6%, 17.7%) |
| None              | 2/16 (12.5%)  | (3.5%, 36.0%) |
| <b>Month 18</b>   |               |               |
| MF59              | 0/24 (0.0%)   | (0.0%, 13.8%) |
| Alum              | 0/28 (0.0%)   | (0.0%, 12.1%) |
| Co-admin          | 0/29 (0.0%)   | (0.0%, 11.7%) |
| None              | 0/15 (0.0%)   | (0.0%, 20.4%) |
